# Supplementary material for: The impact of the COVID-19 pandemic on the mental health of medical staff considering the interplay of pandemic burden and psychosocial resources—A rapid systematic review
Source: PubMed Central journal article supplement (PMC8863237; doi:10.1371/journal.pone.0264290), 2022-02-22
Supplement: pone.0264290.s002.pdf [file pone.0264290.s002.pdf]

## Appendix 1 – Summary of search terms

**Population:** ("healthcare worker\*" OR "healthcare personnel\*" OR "healthcare professional\*" OR "medical professional\*" OR "medical worker\*" OR "medical staff\*" OR "medical personnel\*" OR "hospital personnel\*" OR "hospital staff\*" OR "hospital worker\*" OR "hospital employee\*" OR "medical employee\*" OR "healthcare employee\*" OR "health care worker\*" OR "health care personnel\*" OR "health care employee\*" OR "health care staff\*" OR "healthcare staff\*" OR "allied health staff\*" OR "allied health professional\*" OR "allied health personnel\*" OR "allied health worker\*" OR "doctor\*" OR "nurse\*" OR "physician\*" OR "clinician\*" OR "clinical assistant\*" OR "ward clerk\*" OR "hospital volunteer\*" OR "hospital administrator\*" OR "medical practitioner\*" OR "healthcare practitioner\*" OR "health care practitioner\*" OR "allied health practitioner\*" OR "health worker\*" OR "health professional\*" OR "health practitioner\*" OR "health employee\*" OR "health staff\*" OR "emergency department staff\*" OR "icu staff\*" OR "intensive care unit staff\*" OR "infectious disease unit\*" OR "infectious disease ward\*" OR "health care personnel" OR "health personnel")

**Condition:** ("2019-ncov" OR "coronavirus" OR "covid19" OR "covid" OR "covid-19" OR "ncov" OR "severe acute respiratory syndrome\*" OR "sars-cov-2" OR "sars" OR "sars-related coronavirus" OR "coronavirus disease 2019")

**Outcome (Pandemic burden/Mental health):** ("stressor\*" OR "stress factor\*" OR "risk factor\*" OR "load factor\*" OR "burden\*" OR "load" OR "burdensome factor\*" OR "strain" OR "psychological strain" OR "psychosocial strain" OR "loading factor\*" OR "work-life balance" OR "Effort-reward imbalance" OR "ERI" OR "psychosocial burden" OR "psychological burden" OR "inter-role conflict" OR "interrole conflict" OR "work-life balance" OR "workload" OR "concern\*" OR "moral distress" OR "moral conflict" OR "mental health" OR "wellbeing" OR "psychological distress" OR "emotional stress" OR "Impact of event scale" OR "IES" OR "quality of life" OR "PHQ\*" OR "Patient Health Questionnaire" OR "psychological symptom\*" OR "psychological impact" OR "psychiatric symptom\*" OR "depression" OR "depressive symptom\*" OR "anxiety" OR "posttraumatic stress" OR "post-traumatic burden" OR "post-traumatic stress" OR "posttraumatic burden" OR "burnout" OR "Burn-out" OR "Maslach Burnout Inventory" OR "MBI")

**Outcome (Resources):** ("resilience" OR "resiliency" OR "psychosocial resources" OR "psychological resources" OR "spiritual\*" OR "spiritual wellbeing" OR "social support" OR "optimism" OR "protective factor\*" OR "coping" OR "active coping")

## Search strategy adapted for PubMed

((("healthcare worker"[All Fields] OR "healthcare personnel"[All Fields] OR "healthcare professional"[All Fields] OR "medical professional"[All Fields] OR "medical worker"[All Fields] OR "medical staff"[All Fields] OR "medical personnel"[All Fields] OR "hospital personnel"[All Fields] OR "hospital staff"[All Fields] OR "hospital worker"[All Fields] OR "hospital employee"[All Fields] OR "medical employee"[All Fields] OR "healthcare employee"[All Fields] OR "health care worker"[All Fields] OR "health care personnel"[All Fields] OR "health care employee"[All Fields] OR "health care staff"[All Fields] OR "healthcare staff"[All Fields] OR "allied health staff"[All Fields] OR "allied health professional"[All Fields] OR "allied health personnel"[All Fields] OR "allied health worker"[All Fields] OR "doctor"[All Fields] OR "nurse"[All Fields] OR "physician"[All Fields] OR "clinician"[All Fields] OR "clinical assistant"[All Fields] OR "ward clerk"[All Fields] OR "hospital volunteer"[All Fields] OR "hospital administrator"[All Fields] OR "medical practitioner"[All Fields] OR "healthcare practitioner"[All Fields] OR "health care practitioner"[All Fields] OR "allied health practitioner"[All Fields] OR "health worker"[All Fields] OR "health professional"[All Fields] OR "health practitioner"[All Fields] OR "health employee"[All Fields] OR "health staff"[All Fields] OR "emergency department staff"[All Fields] OR "icu staff"[All Fields] OR "intensive care unit staff"[All Fields] OR "infectious disease unit"[All Fields] OR "infectious disease ward"[All Fields] OR "health care personnel"[All Fields] OR "health personnel"[All Fields]) AND ("2019-ncov"[All Fields] OR "coronavirus"[All Fields] OR "covid19"[All Fields] OR "covid"[All Fields] OR "covid-19"[All Fields] OR "ncov"[All Fields] OR "severe acute respiratory syndrome"[All Fields] OR "sars-cov-2"[All Fields] OR "sars"[All Fields] OR "sars-related coronavirus"[All Fields] OR "coronavirus disease 2019"[All Fields]) AND ("stressor"[All Fields] OR "stress factor"[All Fields] OR "risk factor"[All Fields] OR "load factor"[All Fields] OR "burden"[All Fields] OR "load"[All Fields] OR "burdensome factor"[All Fields] OR "strain"[All Fields] OR "psychological strain"[All Fields] OR "psychosocial strain"[All Fields] OR "loading factor"[All Fields] OR "work-life balance"[All Fields] OR "Effort-reward imbalance"[All Fields] OR "ERI"[All Fields] OR "psychosocial burden"[All Fields] OR "psychological burden"[All Fields] OR "inter-role conflict"[All Fields] OR "interrole conflict"[All Fields] OR "work-life balance"[All Fields] OR "workload"[All Fields] OR "concern"[All Fields] OR "moral distress"[All Fields] OR "moral conflict"[All Fields] OR "mental health"[All Fields] OR "wellbeing"[All Fields] OR "psychological distress"[All Fields] OR "emotional stress"[All Fields] OR "Impact of event scale"[All Fields] OR "IES"[All Fields] OR "quality of life"[All Fields] OR "phq"[All Fields] OR "Patient Health Questionnaire"[All Fields] OR "psychological symptom"[All Fields] OR "psychological impact"[All Fields] OR "psychiatric symptom"[All Fields] OR "depression"[All Fields] OR "depressive symptom"[All Fields] OR "anxiety"[All Fields] OR "posttraumatic stress"[All Fields] OR ("post traumatic"[All Fields] AND ("burden"[All Fields] OR "burdened"[All Fields] OR "burdening"[All Fields] OR "burdens"[All Fields])) OR "post-traumatic stress"[All Fields] OR ("posttraumatic"[All Fields] AND ("burden"[All Fields] OR "burdened"[All Fields] OR "burdening"[All Fields] OR "burdens"[All Fields])) OR "burnout"[All Fields] OR "Burn-out"[All Fields] OR "Maslach Burnout Inventory"[All Fields] OR "MBI"[All Fields]) AND ("resilience"[All Fields] OR "resiliency"[All Fields] OR "psychosocial resources"[All Fields] OR "psychological resources"[All Fields] OR "spiritual"[All Fields] OR "spiritual wellbeing"[All Fields] OR "social support"[All Fields] OR "optimism"[All Fields] OR "protective factor"[All Fields] OR "coping"[All Fields] OR "active coping"[All Fields])) AND ((english[Filter] OR german[Filter])) AND (2019:2021[pdat]))
