# Supplementary material for: The impact of the COVID-19 pandemic on the mental health of medical staff considering the interplay of pandemic burden and psychosocial resources—A rapid systematic review
Source: PubMed Central journal article supplement (PMC8863237; doi:10.1371/journal.pone.0264290), 2022-02-22
Supplement: pone.0264290.s003.pdf [file pone.0264290.s003.pdf]

| <b>Abbreviation</b> | <b>Instrument</b>                                                     |
|---------------------|-----------------------------------------------------------------------|
| AWS                 | Areas of Worklife Scale                                               |
| ASA                 | Adulthood Separation Anxiety                                          |
| BES-A               | Adaptation of the Basic Empathy Scale - short version                 |
| BDI                 | Beck depression inventory                                             |
| BRCOPE              | Brief Coping Orientation to Problems Experienced                      |
| BRCS                | Brief Resilience Coping Scale                                         |
| BRS                 | Brief Resilience Scale                                                |
| BSI-18              | Brief Symptom Inventory-18                                            |
| CAGE-AID            | Substance Abuse Screening Tool                                        |
| CBI                 | Copenhagen Burnout Inventory                                          |
| CD-RISC             | Connor-Davidson Resilience Scale                                      |
| CESQT               | Questionnaire for the Assessment of Workplace Burnout Syndrome        |
| CMBI                | 15-item Chinese version of Maslach Burnout Inventory                  |
| COPM                | Canadian Occupational Performance Measure                             |
| C-SSRS              | Columbia-Suicide Severity Rating Scale                                |
| CSES-SF             | Coping Self-Efficacy Scale                                            |
| DASS-21             | Depression Anxiety Stress Scales-21                                   |
| DD                  | Depersonalization / Derealization inventory by Cox and Swinson (2002) |
| DERS-18             | Difficulties in Emotion Regulation scale                              |
| DES                 | Dissociative Experiences Scale by Bernstein and Putnam                |
| DRS-15              | Dispositional Resilience Scale-15                                     |
| ESQ                 | Emergency Stress Questionnaire                                        |
| FEWS                | Frankfurt Emotional Work Scale                                        |
| GAD                 | General anxiety disorder scale                                        |
| GAD-2               | Generalized Anxiety Disorder 2                                        |
| GAD-7               | General Anxiety Disorder-7                                            |
| GHQ-12              | General Health Questionnaire-12                                       |
| GHQ-28              | General Health Questionnaire-28                                       |
| GSES                | General Self-Efficacy Scale                                           |
| HADS                | Hospital Anxiety and Depression Scale by Zigmond and Snaith           |
| HEI                 | Huaxi Emotional-Distress Index                                        |
| HRQoL               | Health-related quality of life (RAND)                                 |
| IES                 | Impact of Event Scale                                                 |
| IES-6               | Impact of Event Scale-6                                               |
| ISI                 | Insomnia Severity Index                                               |

|              |                                                          |
|--------------|----------------------------------------------------------|
| JCQ          | Job Content Questionnaire                                |
| JSS          | Job Stress scale (by Sosik and Goldshalk (2000)          |
| MBI          | Maslach burnout inventory                                |
| MBI-HSS      | Maslach Burnout Inventory Human Service Survey           |
| MIES         | Moral Injury Events Scale                                |
| MOS-SSS      | Medical Outcomes Study Social Support Survey             |
| MSPSS        | Multidimensional Scale of Perceived Social Support       |
| NSS          | Nurses Stress Scale by Gray-Toft and Anderson            |
| OLBI         | Oldenburg Burnout Inventory                              |
| OPS          | Optimism-Pessimism Scale (by Caliskan and Uzunkol (2018) |
| PCL-5        | Post-traumatic stress disorder checklist                 |
| PC-PTSD      | Primary Care Post-traumatic Stress Disorder Screen       |
| PFI          | Stanford Professional Fulfilment Index                   |
| PHQ-9        | Patient Health Questionnaire–9                           |
| PROMIS       | Patient-Reported Outcomes Measurement Information System |
| ProQOL       | Professional Quality of Life Scale                       |
| PSQI         | Pittsburgh Sleep Quality Index                           |
| PSQI         | Pittsburgh Sleep Quality Index by Buysse et al.          |
| PSS          | Perceived stress scale                                   |
| PSSS         | perceived social support scale                           |
| PWBI         | Mayo Clinic Physician Well-Being Index                   |
| RS-14        | 14-Item Resilience Scale                                 |
| RSA          | Resilience scale for adults                              |
| RSES         | Rosenberg Self-Esteem Scale                              |
| SAS          | Self-Rating Anxiety Scale                                |
| SASRQ / SASR | Stanford Acute Stress Reaction Questionnaire             |
| SCSQ         | Simplified coping style questionnaire                    |
| SDQ          | Strengths and Difficulties Questionnaire                 |
| SOS          | Stress overload Scale                                    |
| SSRS         | Social Support Rate Scale                                |
| STAIsv       | State-Trait Anxiety Inventory by Marteau and Bekker      |
| STSS         | Secondary Traumatic Stress Scale                         |

|                  |                                                                           |
|------------------|---------------------------------------------------------------------------|
| SWEMWBS          | Short Warwick Edinburgh Mental Wellbeing Scale                            |
| SWLS             | Satisfaction with Life Scale                                              |
| TCSQ             | 20-item Trait Coping Style Questionnaire                                  |
| TMMS-24          | Trait Meta-Mood Scale                                                     |
| UNIPSICO Battery | Unidad de Investigación Psicosocial de La Conducta Organizacional Battery |
| WRQOL            | TheWork-Related Quality of Life Scale                                     |
|                  | Copenhagen Burnout Inventory Scale-19 items                               |
